# Supplementary material for: Unraveling the Black Box: Exploring Usage Patterns of a Blended Treatment for Depression in a Multicenter Study
Source: PubMed Central journal article supplement (PMC6686640; doi:10.2196/12707), 2019-07-25

## Moodbuster patient website

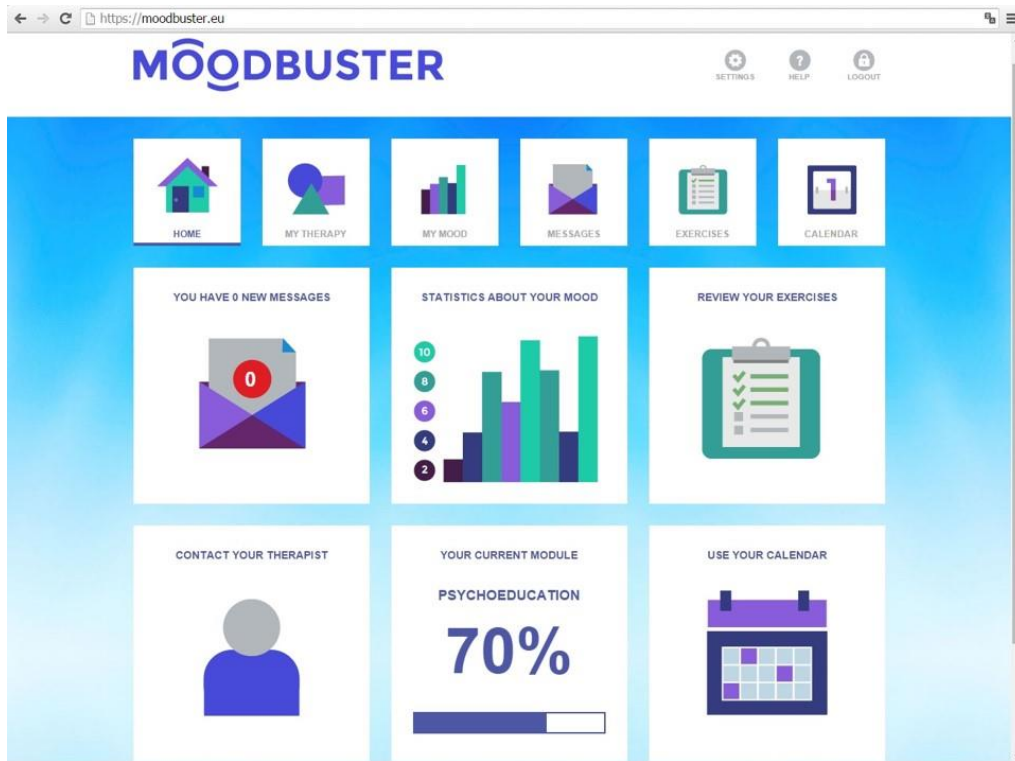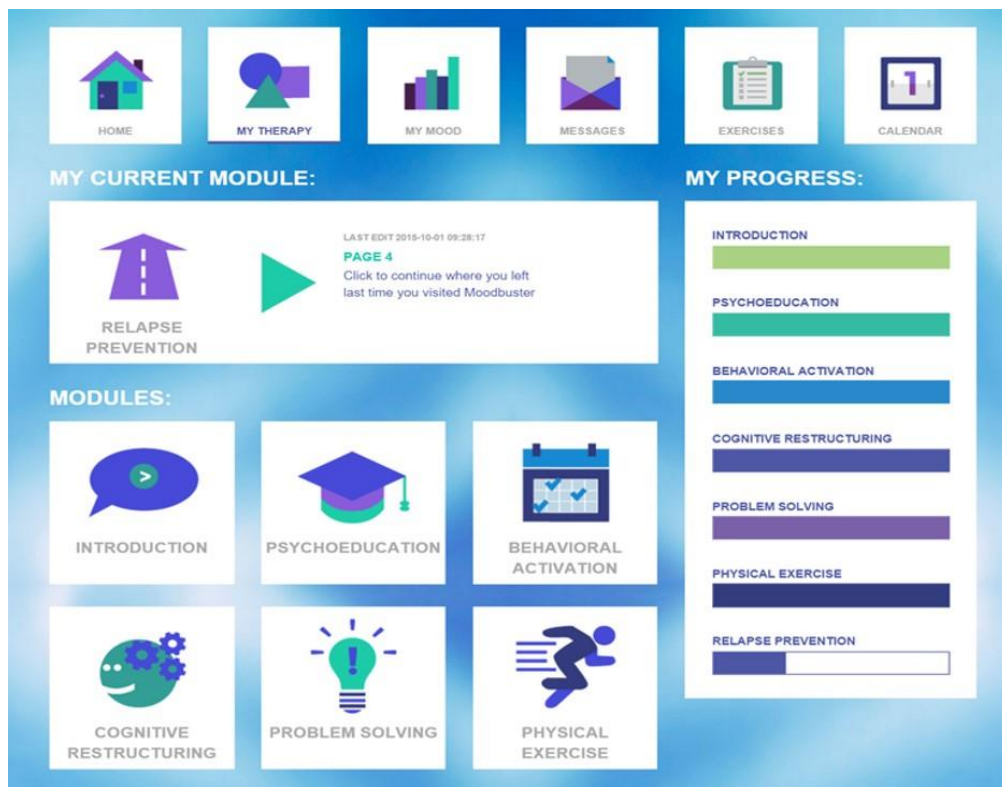

### Moodbuster therapist portal

**MOODBUSTER THERAPIST PORTAL** SETTINGS HELP LOGOUT

PATIENT CODE: MOODBUSTERPATIENT

PROFILE CALENDAR RATINGS THERAPY EXERCISES MESSAGES

#### PERSONAL DATA

[EDIT PATIENT >](#)

LOGIN  
MOODBUSTERpatient

LANGUAGE  
EN

STARTED PROGRAM  
2016-01-08

REGISTERED DATE  
2016-01-08

STATE  
Active

SELF-HELP MODE  
 off

#### APPOINTMENTS

[ADD NEW APPOINTMENT](#)

| DATE                | DURATION (IN MINUTES) | LOCATION | DONE                                |
|---------------------|-----------------------|----------|-------------------------------------|
| 2015-11-16 14:30:00 | 15                    | online   | <input type="checkbox"/>            |
| 2015-11-09 10:00:00 | 45                    | office   | <input checked="" type="checkbox"/> |
| 2015-11-02 14:30:00 | 10                    | online   | <input checked="" type="checkbox"/> |
| 2015-10-26 10:00:00 | 45                    | office   | <input checked="" type="checkbox"/> |
| 2015-10-19 10:00:00 | 15                    | online   | <input checked="" type="checkbox"/> |
| 2015-10-12 10:00:00 | 45                    | office   | <input checked="" type="checkbox"/> |

Go to page: 1 Row count: 10 Showing 1-6 of 6

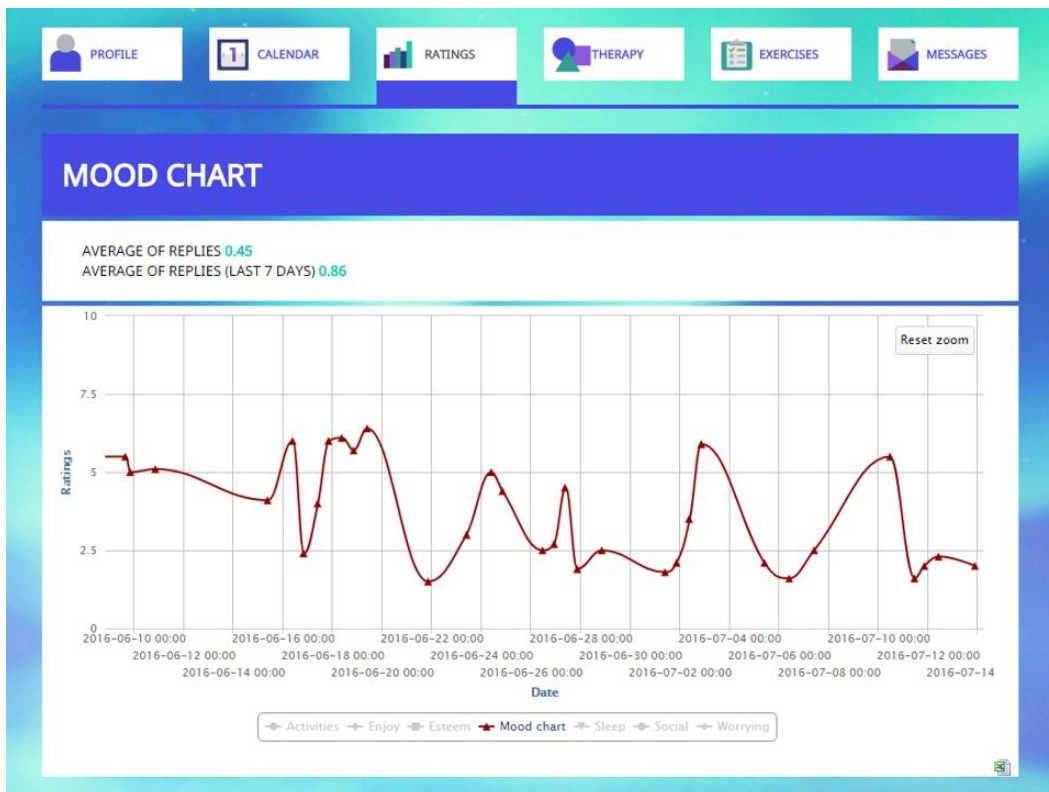

### Moodbuster mobile application

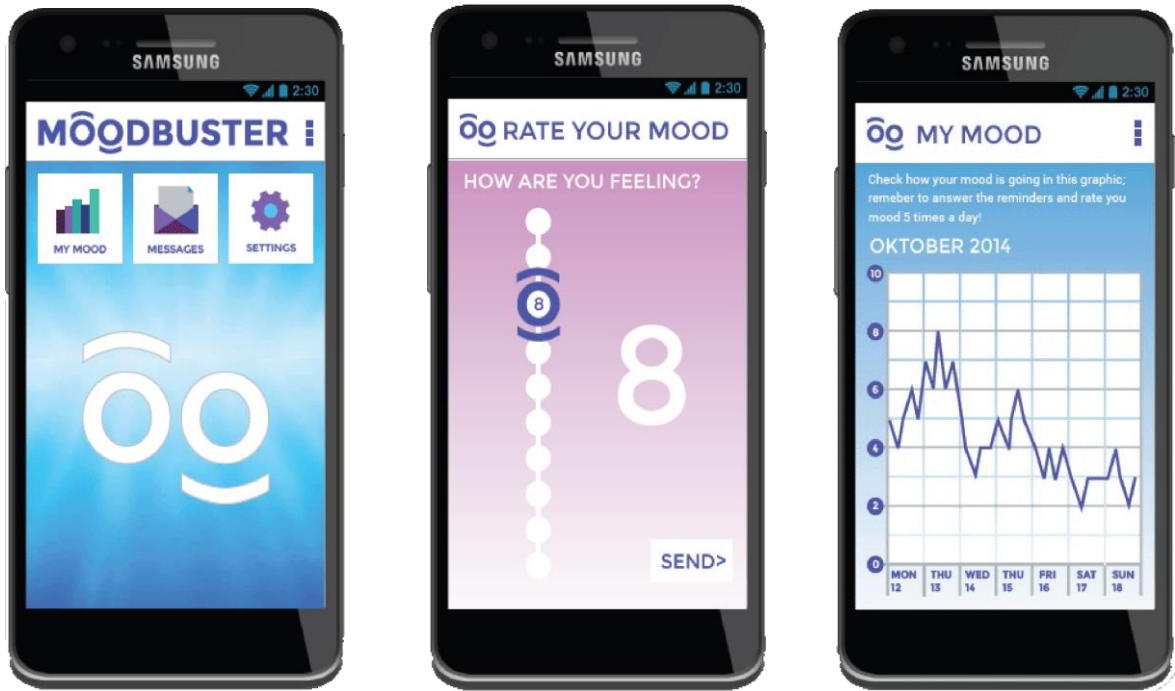

Supplement: mental_v6i7e12707_app1.pdf [file mental_v6i7e12707_app1.pdf]
